# Supplementary material for: Associations of sleep duration and quality with serum and hepatic lipids: The Netherlands Epidemiology of Obesity Study
Source: PubMed Central journal article supplement — J Sleep Res. 2018 Oct 15;28(4):e12776. doi: 10.1111/jsr.12776 (PMC7379241; doi:10.1111/jsr.12776), 2018-10-15
Supplement: JSR-28-e12776-s002.pdf [file JSR-28-e12776-s002.pdf]

A)

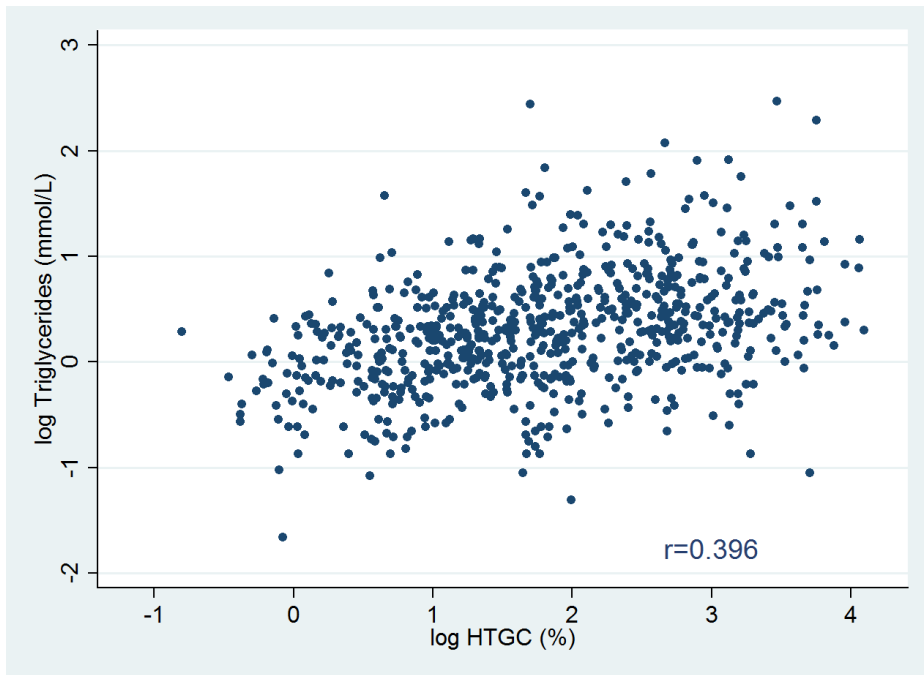

B)

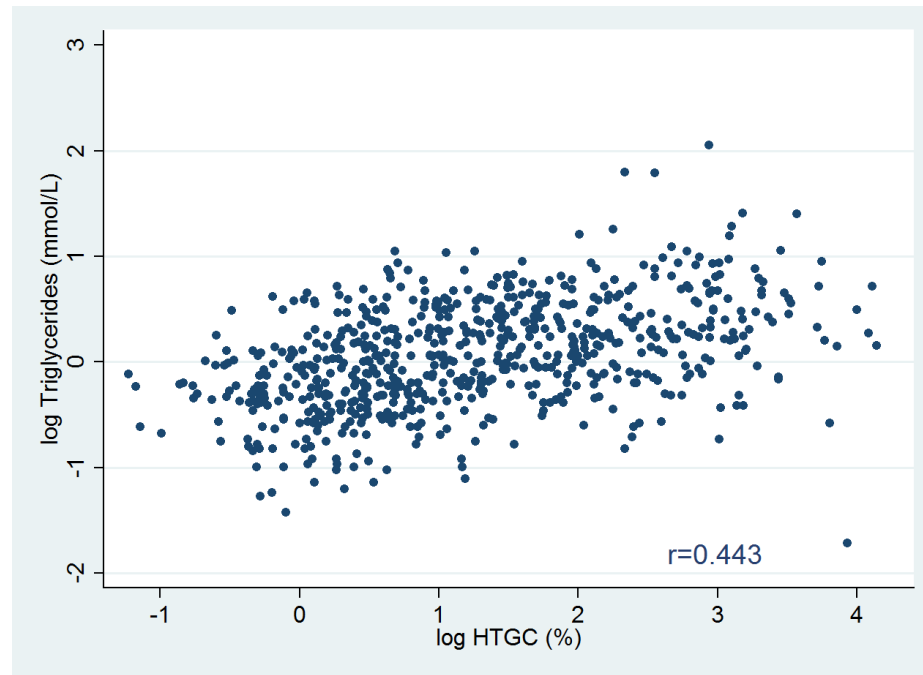

**Supplementary Figure 1.** Correlations between hepatic triglyceride content (HTGC) and fasting triglycerides for A) men and B) women. Abbreviations: HTGC, hepatic triglyceride content; r, Pearson correlation coefficient.
