# Supplementary figures and images for: Associations of sleep duration and quality with serum and hepatic lipids: The Netherlands Epidemiology of Obesity Study
Source: PubMed Central journal article supplement — J Sleep Res. 2018 Oct 15;28(4):e12776. doi: 10.1111/jsr.12776 (PMC7379241; doi:10.1111/jsr.12776), 2018-10-15

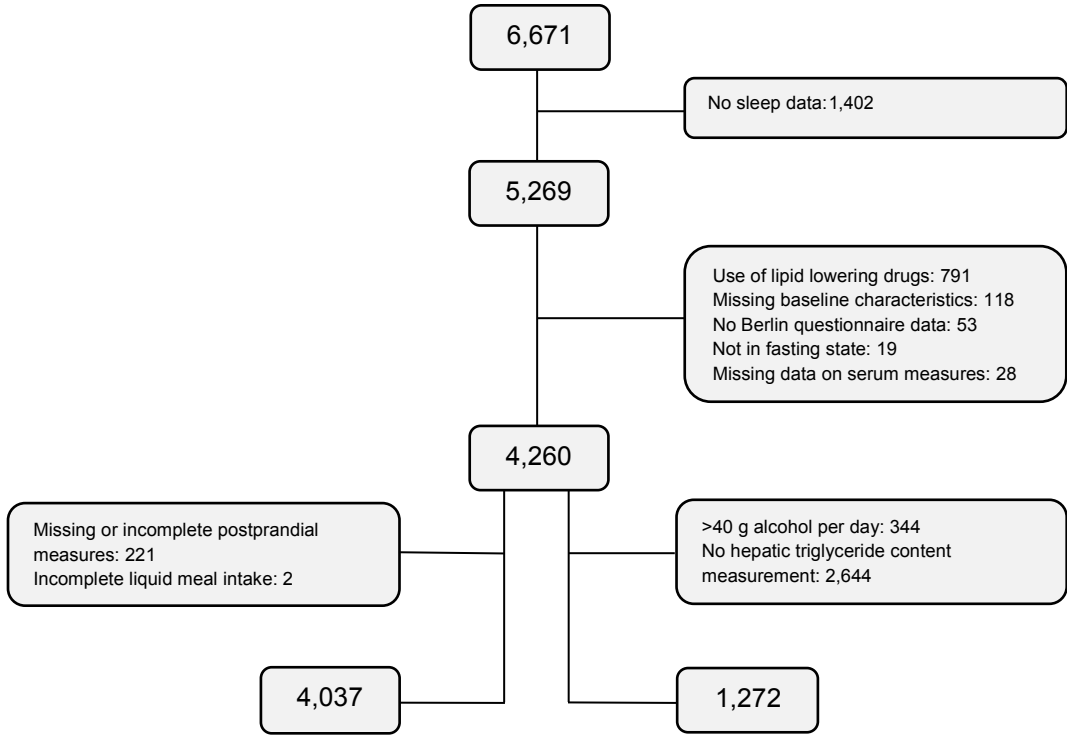

Supplement: JSR-28-e12776-s001.pdf [file JSR-28-e12776-s001.pdf]
